# Supplementary material for: Improved antimicrobial activities of Boswellia sacra essential oils nanoencapsulated into hydroxypropyl-beta-cyclodextrins
Source: Royal Society of Chemistry journal article supplement (doi:10.1039/d3na00882g), 2023-12-22
Supplement: d3na00882g1.pdf [file d3na00882g1.pdf]

## Improved Antimicrobial Activities of *Boswellia Sacra* Essential Oils Nanoencapsulated into Hydroxypropyl-beta-cyclodextrins

Obaydah Abd Alkader Alabrahim<sup>1</sup>, Salim Alwahibi<sup>2</sup>, and Hassan Mohamed El-Said Azzazy<sup>1,3\*</sup>

<sup>1</sup>Department of Chemistry, School of Sciences & Engineering, The American University in Cairo, New Cairo 11835, Egypt. [Obaydah.alabrahim@aucegypt.edu](mailto:Obaydah.alabrahim@aucegypt.edu); [hazzazy@aucegypt.edu](mailto:hazzazy@aucegypt.edu)

<sup>2</sup>Falha Medical Solutions, Muscat 113, Oman.

<sup>3</sup>Department of Nanobiophotonics, Leibniz Institute of Photonic Technology, Jena, Germany.

### Corresponding authors:

**Prof.** Hassan M. E. Azzazy

School of Sciences & Engineering

The American University in Cairo

AUC Avenue, SSE # 1184, P.O. Box 74

New Cairo, Egypt 11835

E-mail: [hazzazy@aucegypt.edu](mailto:hazzazy@aucegypt.edu)

Office: +2 02 2615 2559 (GMT+2 hr)

**Supplementary Figure 1.**

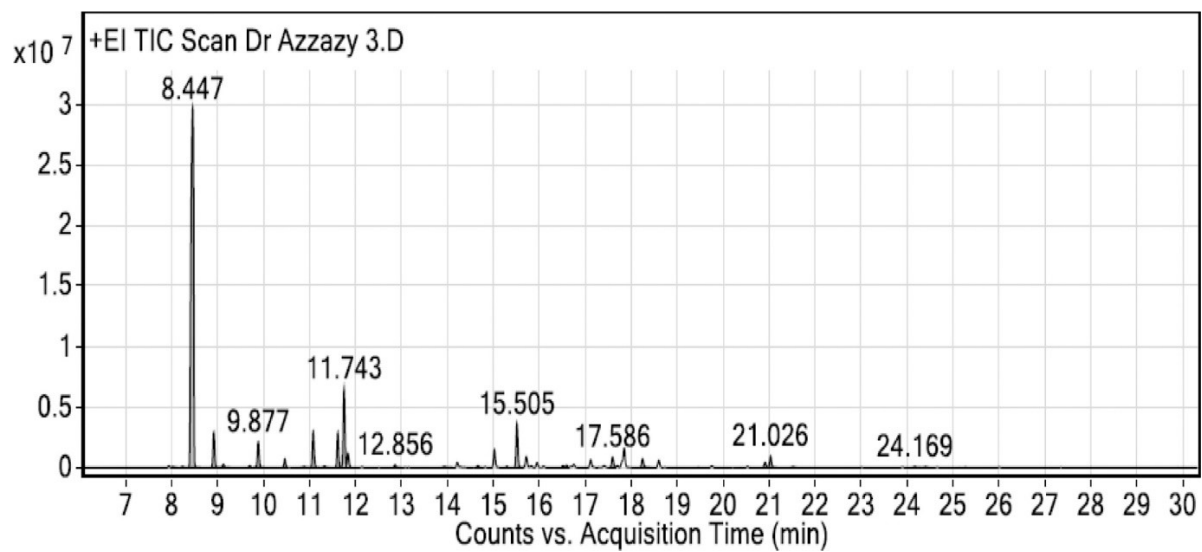

**Figure 1.** GC-MS chromatogram of BO.<sup>1</sup> Reproduced from ref (1). Copyright 2022 American Chemical Society.

**Supplementary Table 1.****Table 1.** BO's Chemical Composition.<sup>1</sup> Reproduced from ref (1). Copyright 2022 American Chemical Society.

| Peak no.                       | RT     | Compound name          | %     |
|--------------------------------|--------|------------------------|-------|
| <b>Monoterpenes</b>            |        |                        |       |
| 1                              | 8.024  | tricyclene             | 0.11  |
| 2                              | 8.229  | $\alpha$ -thujene      | 0.13  |
| 3                              | 8.447  | $\alpha$ -pinene       | 61.05 |
| 4                              | 8.908  | camphene               | 3.67  |
| 5                              | 9.118  | verbenene              | 0.43  |
| 6                              | 9.69   | <i>p</i> -cymene       | 0.25  |
| 7                              | 9.798  | sabinene               | 0.09  |
| 8                              | 9.877  | $\beta$ -pinene        | 2.83  |
| 9                              | 10.454 | $\beta$ -myrcene       | 0.94  |
| 10                             | 10.873 | $\alpha$ -phellandrene | 0.16  |
| 11                             | 11.073 | $\delta$ -3-carene     | 4.22  |
| 12                             | 11.189 | <i>p</i> -cymenene     | 0.06  |
| 13                             | 11.32  | $\alpha$ -terpinene    | 0.19  |
| 14                             | 11.608 | <i>o</i> -cymene       | 3.57  |
| 15                             | 11.743 | d-limonene             | 9     |
| 17                             | 12.856 | $\gamma$ -terpinene    | 0.35  |
| 24                             | 17.586 | alloocimene            | 1.35  |
| 29                             | 21.52  | <i>R</i> (+)-limonen   | 0.11  |
| total                          |        |                        | 88.51 |
| <b>Oxygenated Monoterpenes</b> |        |                        |       |
| 16                             | 11.827 | eucalyptol             | 1.7   |

| Peak no.              | RT     | Compound name                                               | %    |
|-----------------------|--------|-------------------------------------------------------------|------|
| 18                    | 13.922 | <i>trans</i> -d-dihydrocarveol                              | 0.22 |
| 20                    | 15.286 | 6-camphenol                                                 | 0.19 |
| 21                    | 15.505 | 2,3-epoxycarane, ( <i>E</i> )-                              | 4.86 |
| 22                    | 16.506 | verbenol                                                    | 0.24 |
| 23                    | 16.585 | pinocarvone                                                 | 0.33 |
| 25                    | 18.238 | verbenone                                                   | 1.18 |
| 26                    | 19.453 | carvone                                                     | 0.06 |
|                       |        | total                                                       | 8.78 |
| <b>Esters</b>         |        |                                                             |      |
| 27                    | 20.905 | bornyl acetate                                              | 0.66 |
| 28                    | 21.026 | bicyclo[2.2.1]heptane-3-methylene-2,2-dimethyl-5-ol acetate | 1.44 |
|                       |        | total                                                       | 2.1  |
| <b>Sesquiterpenes</b> |        |                                                             |      |
| 30                    | 24.169 | $\beta$ -bourbonene                                         | 0.17 |
| 31                    | 24.401 | $\beta$ -elemene                                            | 0.11 |
| 32                    | 25.267 | caryophyllene                                               | 0.07 |
|                       |        | total                                                       | 0.35 |
| <b>Others</b>         |        |                                                             |      |
| 19                    | 14.658 | 6-isopropenyl-3-methoxymethoxy-3-methyl-cyclohexene         | 0.25 |

## References:

1. Azzazy, H. M. E.-S.; Abdelnaser, A.; Al Mulla, H.; Sawy, A. M.; Shamma, S. N.; Elhusseiny, M.; Alwahibi, S.; Mahdy, N. K.; Fahmy, S. A., Essential Oils Extracted from *Boswellia sacra* Oleo Gum Resin Loaded into PLGA–PCL Nanoparticles: Enhanced Cytotoxic and Apoptotic Effects against Breast Cancer Cells. *ACS Omega* **2023**, *8* (1), 1017-1025 DOI: 10.1021/acsomega.2c06390.
